# Supplementary material for: Historical Aurora Borealis Observations in Anatolia during medieval period: Implications for the past solar activity
Source: Copernicus journal article supplement (doi:10.5194/angeo-2019-97), 2019-08-06
Supplement: Supplementary file [file angeo-2019-97-RC2-supplement.pdf]

**Referee Report on MS angeo-2019-97 “Historical Aurora Borealis  
Observations in Anatolia during medieval period: Implications for the  
past solar activity” by N. Maden**

**General Comments**

This article has examined existing auroral catalogues, compiled auroral reports in Anatolia during the medieval period (apparently between 333 and 1143), and evaluated the “strength” of aurora with five criteria in Neuhäuser and Neuhäuser (2015). The compiled catalogue has been compared mainly with the Byzantine climatic records in Haldon et al. (2014) to discuss the solar-terrestrial relationship during this period. This manuscript is moderately interesting, as the Anatolian auroral records have not been comprehensively studied yet, and the author shows almost the opposite trend of solar activity around 774/775 against Neuhäuser and Neuhäuser (2015), using almost the same dataset and method with Neuhäuser and Neuhäuser (2015). However, this manuscript has to get its contents and novelty significantly improved for further considerations, as the auroral classification method is not very appropriate, the scientific discussions are not convincing enough, and the logic of his discussions on the climate change is extremely difficult to follow. Therefore, it is extremely important to improve the scientific novelty of this manuscript (see specific comments 1 and 2) for further considerations for publication in this journal.

**Specific Comments**

**1. Novelty of the Records**

The largest issue for this manuscript is its novelty, as the catalogued records are not new, classification methodology is not very appropriate, and scientific discussions are not quite sufficient. In order to improve the originality, the authors should consult not the existing catalogues but the original historical documents. This will let us improve accessibility to the original records improved and even potentially resolve apparent discrepancies in several records. The existing catalogues must not be misunderstood as the source documents, as done in Table 1. Showing an example of historical documents as a figure (see *e.g.*, Figures 1 – 2 of Kataoka et al., 2017; Figures 1 – 2 of Kataoka and Iwahashi, 2017) would be beneficial for the readership to understand what kind of historical records you are using in your article.

## **2. “Strength of the Aurora”**

One of the scientific analyses in this article is the evaluation of “strength of the aurora” on the basis of criteria of Neuhäuser and Neuhäuser (2015). However, the author needs to explicitly clarify what the “strength of the aurora” means here. As long as reading Neuhäuser and Neuhäuser (2015), these criteria are not for strength but for likeliness. The strength of aurora is rather associated with the equatorward boundary of the aurora, as it has a good correlation with strength of magnetic storm (Yokoyama et al., 1998; Kataoka and Iwahashi, 2017). In this sense, stronger aurora will appear more southward and contradict the criteria for direction in Neuhäuser and Neuhäuser (2015). The author needs to revise and address the strength of aurora, citing Yokoyama et al. (1998) and Kataoka and Iwahashi (2017).

## **3. The Validity of Criteria**

The author needs to seriously consider the validity of the criteria used in this manuscript and if they should be used in his manuscript. While the five criteria are based on (1) night-time (darkness, sunset, sunrise), (2) non-southern directions (northern, NE, NW, E-W, W-E), (3) color (red, reddish, fiery, bloody, green, black), (4) dynamics (fire, fiery), and (5) repetition, these criteria are unfortunately not consistent with observational evidence, as shown in Stephenson et al. (2019). I think the recent criticism makes good sense. Recent fact-based studies show that the equatorward boundaries of the aurora reach 25°, 24°, and 38° magnetic latitudes during the historical magnetic storms in 1770, 1859, and 1958 (Kimball, 1960; Kataoka and Iwahashi, 2017; Kataoka et al., 2019; Kataoka and Kazama, 2019). In the cases of such extreme space weather events, aurorae will be seen even southward from medieval Turkey (45 – 50.1° in magnetic latitude). It is also known that whitish pillar appears equatorward of the red glow during the strong magnetic storms, probably due to field-align currents carried by precipitating electrons (Kataoka et al., 2019). It is also not clear why fire or fiery means dynamics of aurora. The descriptions like “fire” more likely means auroral color and brightness (see Figure 1 of Kataoka and Kazama, 2019). The author needs to address these facts to evaluate validity of these criteria at the very least, if he strongly wishes to use these criteria in his manuscript. Otherwise, the author should not use these “criteria”.

#### **4. Solar Activity around 774/775**

In scientific viewpoint, exploiting the discussions on the solar activity around 774/775 would benefit scientific community, as this is quite close to the cosmic ray event in 774/775 (*e.g.*, Miyake et al., 2012; Usoskin et al., 2013; Mekhaldi et al., 2015). The author seems to support the high solar activity (p.11; see also *e.g.*, Usoskin et al., 2013) with the reports and methods used in Neuhäuser and Neuhäuser (2015), whereas Neuhäuser and Neuhäuser (2015) suggested a solar minimum around 774. The author's result may be helpful to reconstruct the solar activity around 774/775, on which we have opposite reconstructions: low solar activity (Neuhäuser and Neuhäuser, 2015) and high solar activity (Usoskin et al., 2013; Stephenson et al., 2019). The author needs to clarify the scientific implications of his article for the solar activity around 774/775, evaluating the validity of the validity of Neuhäuser and Neuhäuser (2015).

#### **5. Chronological Coverage**

The author should define the survey object, namely the chronological extent of medieval Period and the geographical extent of Anatolia. Re chronological coverage, while the author's survey extent seems consistent with the former half of the Byzantine Empire (330 – 1453) in Haldon et al. (2014), the author should clarify why they stopped surveys in 1143.

#### **6. Definition of the Medieval Anatolia**

The definition of Anatolia is not clear as well. Geographically speaking, Constantinople is not in Anatolia but situated in the European side. The author needs to address why Asia Minor is exactly specified to be around current Ankara. It is also not very clear where is the border between Anatolia and Middle East. At least, it should not be the modern Turkish border. In my understanding, Edessa and Amida would be better located in the Middle East, rather than Anatolia.

#### **7. Relationship with Past Solar Activity**

The second conclusion in this manuscript states “In Anatolia and Middle East, there was a relatively high auroral activity during the years around 1100 is quite consistent with the naked-eye sunspot observations”. However, the naked-eye sunspot observations are

mentioned only briefly in in the context of Medieval Maximum (p.12) and periodicity between 1095 and 1204 is usual (Vaquero and Trigo, 2012). Therefore, the author should compare these auroral records with the naked-eye sunspot observations. Moreover, the cycle length during the Medieval Maximum is probably shorter (~9 years) on the basis of  $^{14}\text{C}$  data (Miyahara et al., 2008) and their cycle reconstructions are shown in Kataoka et al. (2017). Hence the existing statement for solar cycle length needs to be revised, citing Miyahara et al. (2008) and Kataoka et al. (2017). This enhanced solar activity is also better illustrated, citing the earliest datable sunspot drawing and relevant Korean auroral records in 1128 (Willis and Stephenson, 2001; Willis and Davis, 2014), and contrasted with the Oort Minimum (Usoskin et al., 2007, 2017; see also Inceoglu et al., 2015).

## **8. Relationship with Climatic Change**

While this manuscript is entitled as “Implications for the past solar activity” in its subtitle, the impacts on the climatic change has been emphasized in the manuscript (pp.13-14 and conclusions 5 – 6). However, the logic was extremely difficult to follow and the revision of humidity with auroral record has been applied without scientific explanations. The relationship between solar activity and climatic change in historical time span is not very clear (Vaquero and Trigo, 2012; Lockwood et al., 2017), while we know at least the lightning has correlation with solar rotation (Miyahara et al., 2017, 2018), and galactic cosmic ray fluence have some influence to snowball Earth (Kataoka et al., 2013, 2014) as well as explosive volcanic eruptions (Ebisuzaki et al., 2011). Therefore, the author is strongly recommended to separate their discussions for the climatic change to another article, indicating the solar-terrestrial relationship in short and very long time spans. This separation will make the logic in this manuscript more straightforward and improve its readability.

## **9. Conclusions**

Accordingly, the conclusion needs to be modified. The second and third conclusions can be retained only if the author address naked-eye sunspot records appropriately. The fourth conclusion cannot co-exist with the third conclusion, as their coexistence make it unclear what was the main factor: solar activity or intensity of dipole moment and position of geomagnetic pole. The fifth and sixth conclusions should be separated to

another article, as well as the discussions on the climate change.

### **Technical Corrections**

Technical corrections shown here are only those with relatively major importance. The author is strongly recommended to send this manuscript grammatical proofreading before resubmission, in order to improve the readability of this manuscript.

Line 28: For Chinese aurorae, cite Kataoka et al. (2017).

Line 27: For Japanese aurorae, cite Kataoka et al. (2017) and Kataoka et al. (2017). Remove Shiokawa et al. (2005), as this article is about modern instrumental observations.

Line 40-48: Remove this paragraph.

Line 109: The 502 August 22 event appears in the Zuqin Chronicle too. Cite Hayakawa et al. (2017).

Line 131-155: The first observation in Zuqin Chronicle should not be 772 but 771/772, namely somewhere between 771 October and 772 September, as the timing of harvest is not specified for a specific crop and there were multiple crops in Anatolia back then (Hayakawa et al., 2017).

Line 233-236: This statement should be brought somewhere before method, to clarify what the author surveyed.

Line 263-273: Separate this paragraph to another article.

Line 293-319: Separate these paragraphs to another article.

Line 324: “were thought” should be “thought”

Table 1: Remove it or replace it to a list of historical documents.

Table 2 and 4: The reference must be revised to the original historical documents.

Table 5: Remove it.

Figure 1: Remove the modern border and revise the location for Asia Minor.

Figure 2: Remove it.

Figure 3: Define the border of Anatolia and Middle East.

### **References**

Ebisuzaki et al. (2011) Explosive volcanic eruptions triggered by cosmic rays: Volcano as a bubble chamber, *Gondwana Research*, **19**, 1054-1061.

- Hayakawa, H., et al. (2017) The earliest drawings of 425 datable auroras and a two-tail comet from the Syriac Chronicle of Zūqnīn, *Publications of the Astronomical Society of Japan*, **69**, 17.
- Inceoglu, F., et al. (2015) Grand solar minima and maxima deduced from  $^{10}\text{Be}$  and  $^{14}\text{C}$ : magnetic dynamo configuration and polarity reversal, *Astronomy & Astrophysics*, **577**, A20.
- Kataoka, R., et al. (2013) Snowball Earth events driven by starbursts of the Milky Way Galaxy, *New Astronomy*, **21**, 50-62.
- Kataoka, R., et al. (2014) The Nebula Winter: The united view of the snowball Earth, mass extinctions, and explosive evolution in the late Neoproterozoic and Cambrian periods, *Gondwana Research*, **25**, 1153-1163.
- Kataoka, R., et al. (2017) Historical space weather monitoring of prolonged aurora activities in Japan and in China, *Space Weather*, **15**, 392-402.
- Kataoka, R., Iwahashi, K. (2017) Inclined zenith aurora over Kyoto on 17 September 1770: Graphical evidence of extreme magnetic storm, *Space Weather*, **15**, 1314-1320.
- Kataoka, R., et al. (2019) Fan-shaped aurora as seen from Japan during a great magnetic storm on February 11, 1958, *J. Space Weather Space Clim.*, **9**, A16.
- Kataoka, R., Kazama, S. (2019) A watercolor painting of northern lights seen above Japan on 11 February 1958, *J. Space Weather Space Clim.*, **9**, A28.
- Lockwood, M., et al. (2017) Frost fairs, sunspots and the Little Ice Age, *Astronomy & Geophysics*, **58**, 2.17–2.23.
- Mekhaldi, F., et al. (2015) Multiradionuclide evidence for the solar origin of the cosmic-ray events of AD 774/5 and 993/4, *Nature Communications*, **6**, 8611.
- Miyahara, H., Yokoyama, Y., Masuda, K. (2008) Possible link between multi-decadal climate cycles and periodic reversals of solar magnetic field polarity, *Earth and Planetary Science Letters*, **272**, 290–295
- Miyahara, H., et al. (2017) Searching for the 27-day solar rotational cycle in lightning events recorded in old diaries in Kyoto from the 17th to 18th century, *Annales Geophysicae*, **35**, 1195-1200.
- Miyahara, H., et al. (2018) Solar rotational cycle in lightning activity in Japan during the 18–19th centuries, *Annales Geophysicae*, **36**, 633-640
- Miyake, F., Nagaya, K., Masuda, K., Nakamura, T. (2012) A signature of cosmic-ray

- increase in AD 774-775 from tree rings in Japan, *Nature*, **486**, 7402, 240-242
- Neuhäuser, R., Neuhäuser, D. L. (2015) Solar activity around AD 775 from aurorae 472 and radiocarbon, *Astronomische Nachrichten*, **336**, 225–248
- Stephenson, F. R., et al. (2019) Do the Chinese Astronomical Records Dated AD 776 January 12/13 Describe an Auroral Display or a Lunar Halo? A Critical Re-examination, *Solar Physics*, **294**, 36.
- Usoskin, I. G. (2017) A history of solar activity over millennia, *Living Reviews in Solar Physics*, **14**, 3.
- Usoskin, I. G., Solanki, S. K., Kovaltsov, G. A. (2007) Grand minima and maxima of solar activity: new observational constraints, *Astronomy and Astrophysics*, **471**, 301-309.
- Usoskin, I. G., Kromer, B., Ludlow, F., Beer, J., Friedrich, M., Kovaltsov, G. A., Solanki, S. K., Wacker, L. (2013) The AD775 cosmic event revisited: the Sun is to blame, *Astronomy & Astrophysics*, **552**, L3.
- Vaquero, J.M., Trigo, R.M. (2012) A Note on Solar Cycle Length during the Medieval Climate Anomaly, *Solar Physics*, **279**, 289-294.
- Willis, D. M., Davis, C. J. (2015) Evidence for Recurrent Auroral Activity in the Twelfth and Seventeenth Centuries. In: Orchiston W., Green D., Strom R. (eds) *New Insights From Recent Studies in Historical Astronomy: Following in the Footsteps of F. Richard Stephenson*. Springer, Berlin.
- Willis, D. M., Stephenson, F. R. (2001) Solar and auroral evidence for an intense recurrent geomagnetic storm during December in AD 1128, *Annales Geophysicae*, **19**, 289-302.
- Yokoyama, N., Kamide, Y., Miyaoka, H. (1998) The size of the auroral belt during magnetic storms, *Annales Geophysicae*, **16**, 566-573.
